# Supplementary material for: Notch Missense Mutations in Drosophila Reveal Functions of Specific EGF-like Repeats in Notch Folding, Trafficking, and Signaling
Source: Biomolecules. 2022 Nov 25;12(12):1752. doi: 10.3390/biom12121752 (PMC9775759; doi:10.3390/biom12121752)
Supplement: Supplementary file 1 [file biomolecules-12-01752-s001.zip › biomolecules-1845033 - Supplementary - new11.28.pdf]

## Supplementary Materials

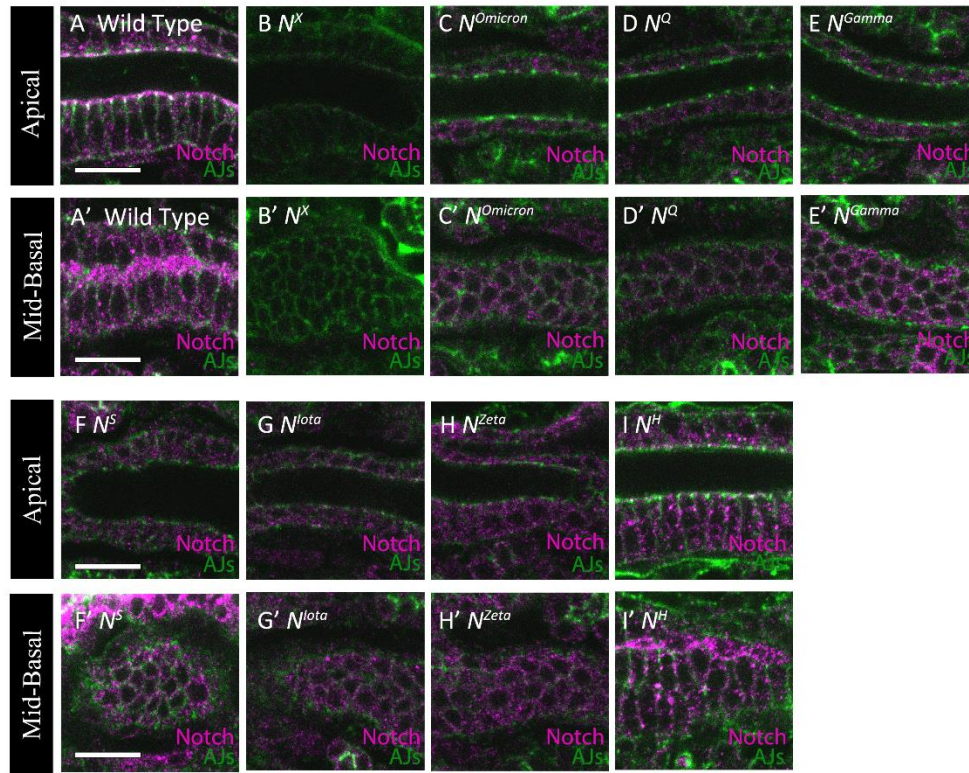

**Figure S1. Notch did not localize to AJs in Class II and IV *Notch* mutants**

(A-I') Notch (magenta) and adherens junctions (AJs; green) in hindgut epithelia in wild-type *Drosophila* (A and A') and in hemizygotes of  $N^X$  (B and B'),  $N^{Omicron}$  (C and C'),  $N^Q$  (D and D'),  $N^{Gamma}$  (E and E'),  $N^S$  (F and F'),  $N^{lota}$  (G and G'),  $N^{Zeta}$  (H and H'), and  $N^H$  (I and I'), stained by anti-Notch and anti-E-cadherin antibodies, respectively. Apical and mid-basal images (left side) correspond to the diagram of apical and mid-basal planes in Figure 5A. All results were confirmed by staining biological triplicates. Scale bars: 10  $\mu$ m.

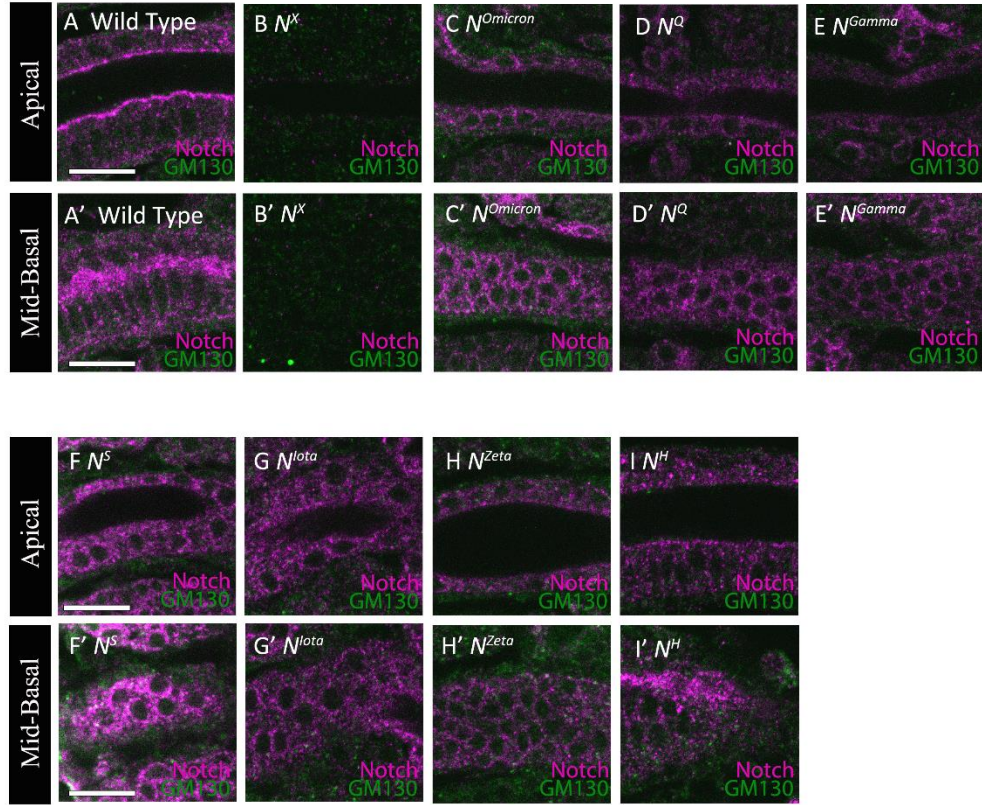

**Figure S2. Class II and IV *Notch* mutants did not accumulate Notch in *cis*-Golgi.**

(A-I') Notch (magenta) and *cis*-Golgi (green) of hindgut epithelia in wild type (A and A') and hemizygotes of  $N^X$  (B and B'),  $N^{Omicron}$  (C and C'),  $N^Q$  (D and D'),  $N^{Gamma}$  (E and E'),  $N^S$  (F and F'),  $N^{Iota}$  (G and G'),  $N^{Zeta}$  (H and H'), and  $N^H$  (I and I') were detected by anti-Notch and anti-GM130 antibody staining, respectively. Apical and mid-basal images (left side) correspond to the diagram of apical and mid-basal planes in Figure 5A. All results were confirmed through by staining of biological triplicates. Scale bars: 10  $\mu$ m.

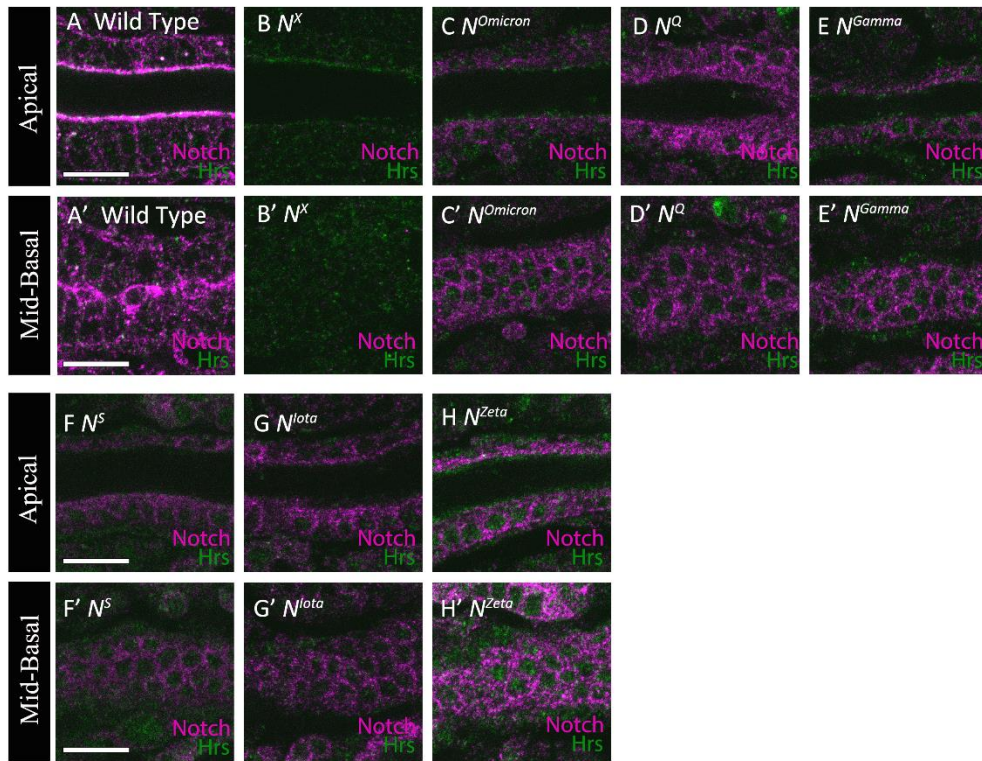

**Figure S3. Class IV *Notch* mutants did not accumulate Notch in early endosomes**

(A-H') Notch (magenta) and early endosomes (green) of hindgut epithelia in wild type (A and A') and in hemizygotes of  $N^X$  (B and B'),  $N^{Omicron}$  (C and C'),  $N^Q$  (D and D'),  $N^{Gamma}$  (E and E'),  $N^S$  (F and F'),  $N^{lota}$  (G and G'), and  $N^{Zeta}$  (H and H') were detected by anti-Notch and anti-Hrs antibody staining, respectively. Apical and mid-basal images (left side) correspond to the diagram of apical and mid-basal planes in Figure 5A. All results were confirmed by staining biological triplicates. Scale bars: 10  $\mu$ m.

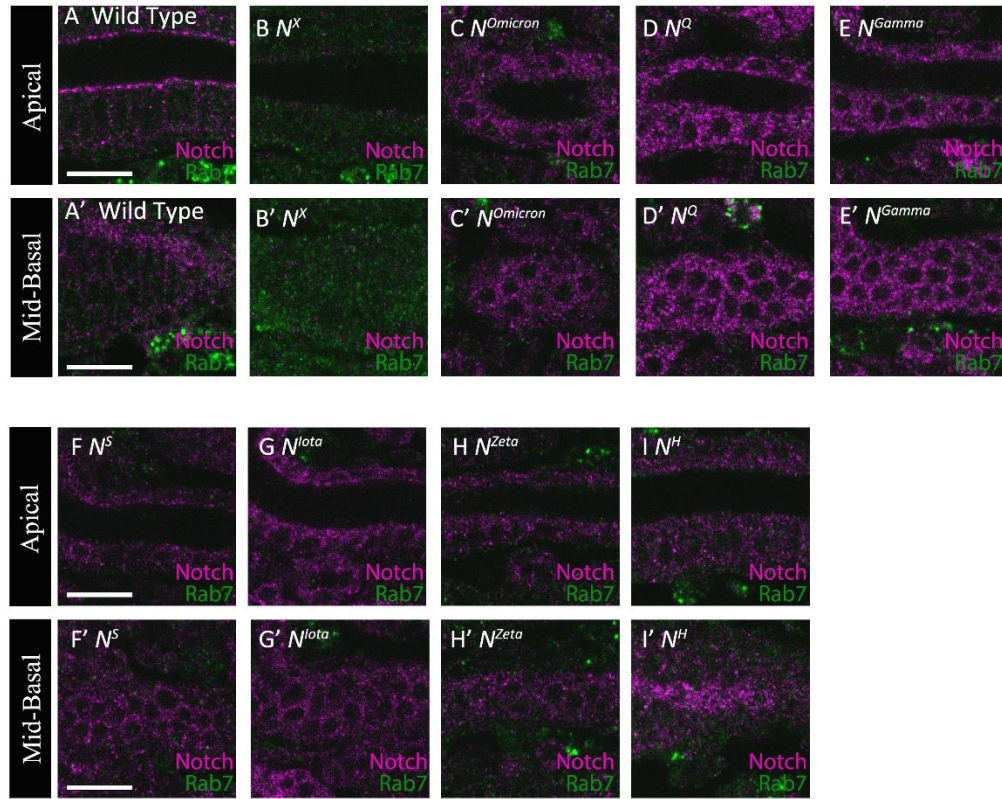

**Figure S4. Class II and IV *Notch* mutants did not accumulate Notch in late endosomes**

(A-I') Notch (magenta) and late endosomes (green) of hindgut epithelia in wild-type embryos (A and A') and hemizygotes of  $N^X$  (B and B'),  $N^{Omicron}$  (C and C'),  $N^Q$  (D and D'),  $N^{Gamma}$  (E and E'),  $N^S$  (F and F'),  $N^{Iota}$  (G and G'),  $N^{Zeta}$  (H and H'), and  $N^H$  (I and I'), detected with anti-Notch and anti-Rab7 antibody staining, respectively. Apical and mid-basal images (left side) correspond to the diagram of apical and mid-basal planes as described in Figure 5A. All results were confirmed by staining biological triplicates. Scale bars: 10  $\mu$ m.

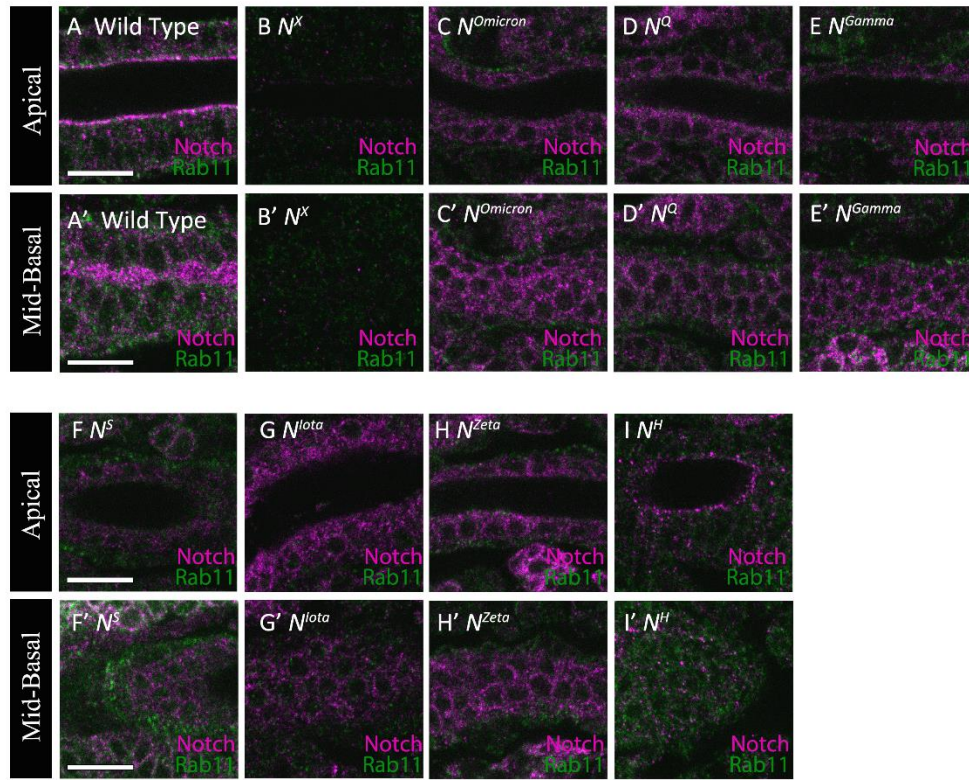

**Figure S5. Class II and Class IV *Notch* mutants did not accumulate Notch in recycling endosomes**  
 (A-I') Notch (magenta) and recycling endosomes (green), detected by anti-Notch and anti-Rab11 antibody staining, respectively, in hindgut epithelia in wild-type embryos (A and A') and hemizygotes of *N<sup>X</sup>* (B and B'), *N<sup>Omicron</sup>* (C and C'), *N<sup>Q</sup>* (D and D'), *N<sup>Gamma</sup>* (E and E'), *N<sup>S</sup>* (F and F'), *N<sup>lota</sup>* (G and G'), *N<sup>Zeta</sup>* (H and H'), and *N<sup>H</sup>* (I and I'). Apical and mid-basal images (left side) correspond to the diagram of optical planes in Figure 5A. Results were confirmed by staining biological triplicates. Scale bars: 10  $\mu$ m.
